# Supplementary material
Source: PubMed Central journal article supplement (PMC6522287)
Supplement: NIHMS1526390-supplement-2.pdf [file NIHMS1526390-supplement-2.pdf]

**Supplementary Table 1.** Clinical characteristics of patients included in TMA.

| <b>University of Chicago GBM survival analysis</b> |           |            |            |
|----------------------------------------------------|-----------|------------|------------|
| MALAT1 ISH staining score                          |           | Low        | High       |
| Total patient number                               |           | 19         | 15         |
| Age in years (median, range)                       |           | 55 (44-67) | 58 (45-61) |
| Vital status                                       | Alive     | 0          | 0          |
|                                                    | Deceased  | 19         | 15         |
| <i>IDH1</i> mutation status*                       | Wildtype  | 18         | 13         |
|                                                    | Mutant    | 0          | 2          |
|                                                    | Unknown   | 1          | 0          |
| Treatment                                          | TMZ       | 19         | 14         |
|                                                    | IR        | 19         | 15         |
|                                                    | Untreated | 0          | 0          |

\* Assessed by IHC staining for *IDH1*-R132H
