# Supplementary material
Source: PubMed Central journal article supplement (PMC6522287)
Supplement: NIHMS1526390-supplement-3.pdf [file NIHMS1526390-supplement-3.pdf]

**Supplementary Table 2.** Genome-wide expression analysis of sh-Control cells treated with vehicle vs. sh-Control cells treated with TMZ

| ID           | logFC       | t           | P.Value  | adj.P.Val   | Gene Symbol            | Gene Title                                                                               | Entrez Gene ID     | Cytoband     | Overlapped in "sh-p105 vs. sh-p105 TMZ" |
|--------------|-------------|-------------|----------|-------------|------------------------|------------------------------------------------------------------------------------------|--------------------|--------------|-----------------------------------------|
| 221577_x_at  | 1.135132792 | 14.537524   | 4.94E-09 | 0.000144655 | iDF15 /// LOC100292462 | growth differentiation factor 15 /// similar to growth differentiation factor 15         | 100292463 /// 9518 | 19p13.11     | YES                                     |
| 237737_at    | 0.97081682  | 14.4496941  | 5.29E-09 | 0.000144655 | LOC100289026           | similar to hCG1744891                                                                    | 100289026          | ---          | YES                                     |
| 202284_s_at  | 0.884328952 | 13.7553241  | 9.31E-09 | 0.00016964  | CDKN1A                 | cyclin-dependent kinase inhibitor 1A (p21, Cip1)                                         | 1026               | 6p21.2       | YES                                     |
| 201236_s_at  | 1.121974278 | 12.7752204  | 2.16E-08 | 0.000295256 | BTG2                   | BTG family, member 2                                                                     | 7832               | 1q32         | YES                                     |
| 207813_s_at  | 0.808946167 | 11.7750365  | 5.42E-08 | 0.000584067 | FDXR                   | ferredoxin reductase                                                                     | 2232               | 17q24-q25    | YES                                     |
| 238733_at    | 1.083525578 | 11.4976142  | 7.07E-08 | 0.000584067 | ---                    | ---                                                                                      | ---                | ---          | YES                                     |
| 1559462_at   | 0.870868989 | 11.4403532  | 7.48E-08 | 0.000584067 | ---                    | ---                                                                                      | ---                | ---          | YES                                     |
| 209806_at    | -0.68871326 | -10.8872631 | 1.30E-07 | 0.000886566 | HIST1H2BK              | histone cluster 1, H2bk                                                                  | 85236              | 6p21.33      | YES                                     |
| 203409_at    | 0.683286021 | 10.6893251  | 1.59E-07 | 0.000965243 | DDB2                   | damage-specific DNA binding protein 2, 48kDa                                             | 1643               | 11p12-p11    | YES                                     |
| 201939_at    | 0.542588502 | 9.73561734  | 4.42E-07 | 0.00227022  | PLK2                   | polo-like kinase 2 (Drosophila)                                                          | 10769              | 5q12.1-q13.2 | ---                                     |
| 225160_x_at  | 0.832972337 | 9.70549739  | 4.57E-07 | 0.00227022  | MDM2                   | Mdm2 p53 binding protein homolog (mouse)                                                 | 4193               | 12q14.3-q15  | ---                                     |
| 204781_s_at  | 0.558055219 | 9.16730379  | 8.44E-07 | 0.003845779 | FAS                    | Fas (TNF receptor superfamily, member 6)                                                 | 355                | 10q24.1      | YES                                     |
| 208490_x_at  | -0.66821344 | -9.08980419 | 9.24E-07 | 0.003887041 | HIST1H2BF              | histone cluster 1, H2bf                                                                  | 8343               | 6p21.3       | ---                                     |
| 204780_s_at  | 0.577162016 | 8.83220463  | 1.25E-06 | 0.004906015 | FAS                    | Fas (TNF receptor superfamily, member 6)                                                 | 355                | 10q24.1      | ---                                     |
| 244117_at    | 0.940702451 | 8.73309606  | 1.41E-06 | 0.005154257 | ---                    | ---                                                                                      | ---                | ---          | ---                                     |
| 205543_at    | 0.552391245 | 8.55495964  | 1.76E-06 | 0.005688746 | HSPA4L                 | heat shock 70kDa protein 4-like                                                          | 22824              | 4q28         | YES                                     |
| 218346_s_at  | 0.587130562 | 8.54292212  | 1.78E-06 | 0.005688746 | SESN1                  | sestrin 1                                                                                | 27244              | 6q21         | YES                                     |
| 236640_at    | -0.59668149 | -8.50323587 | 1.87E-06 | 0.005688746 | LOC399959              | Hypothetical LOC399959                                                                   | 399959             | 11q24.1      | YES                                     |
| 215719_x_at  | 0.6823407   | 8.23071828  | 2.63E-06 | 0.007063346 | FAS                    | Fas (TNF receptor superfamily, member 6)                                                 | 355                | 10q24.1      | YES                                     |
| 200974_at    | 0.549493843 | 8.20661423  | 2.71E-06 | 0.007063346 | ACTA2                  | actin, alpha 2, smooth muscle, aorta                                                     | 59                 | 10q23.3      | YES                                     |
| 201060_x_at  | 0.53978797  | 8.19617736  | 2.75E-06 | 0.007063346 | STOM                   | stomatin                                                                                 | 2040               | 9q34.1       | YES                                     |
| 242134_at    | 0.618378387 | 8.17025563  | 2.84E-06 | 0.007063346 | ---                    | ---                                                                                      | ---                | ---          | ---                                     |
| 231534_at    | 0.554439703 | 8.10335853  | 3.10E-06 | 0.007357641 | CDK1                   | Cyclin-dependent kinase 1                                                                | 983                | 10q21.1      | ---                                     |
| 1566147_a_at | 0.728594773 | 8.03176513  | 3.39E-06 | 0.007729129 | LOC375010              | ankyrin repeat domain 20 family, member A pseudogene                                     | 375010             | 1q21.1       | YES                                     |
| 208579_x_at  | -0.62627162 | -7.85369249 | 4.27E-06 | 0.009347256 | H2BFS                  | H2B histone family, member 5                                                             | 54145              | 21q22.3      | ---                                     |
| 228582_x_at  | 0.787458567 | 7.77673727  | 4.73E-06 | 0.009369709 | MALAT1                 | Metastasis associated lung adenocarcinoma transcript 1 (non-protein coding)              | 378938             | 11q13.1      | ---                                     |
| 210609_s_at  | 0.586057234 | 7.75678018  | 4.85E-06 | 0.009369709 | TP53I3                 | tumor protein p53 inducible protein 3                                                    | 9540               | 2p23.3       | ---                                     |
| 235456_at    | -1.10645703 | -7.75393722 | 4.87E-06 | 0.009369709 | ---                    | ---                                                                                      | ---                | ---          | ---                                     |
| 229711_s_at  | 0.607335871 | 7.7388853   | 4.97E-06 | 0.009369709 | MDM2                   | Mdm2 p53 binding protein homolog (mouse)                                                 | 4193               | 12q14.3-q15  | YES                                     |
| 229795_at    | -0.54843367 | -7.59569238 | 6.01E-06 | 0.010895418 | ---                    | ---                                                                                      | ---                | ---          | ---                                     |
| 208890_s_at  | 0.593964757 | 7.57532558  | 6.18E-06 | 0.010895418 | PLXNB2                 | plexin B2                                                                                | 23654              | 22q13.33     | YES                                     |
| 229868_s_at  | 1.052165298 | 7.44897527  | 7.32E-06 | 0.012514035 | LOC100287132           | hypothetical protein LOC100287132                                                        | 100287132          | 19p13.11     | YES                                     |
| 234689_at    | 0.953982594 | 7.3123553   | 8.82E-06 | 0.014619659 | G6orf138               | chromosome 6 open reading frame 138                                                      | 442213             | 6p12.3       | ---                                     |
| 225912_at    | 0.716295931 | 7.28046319  | 9.22E-06 | 0.014825257 | TP53INP1               | tumor protein p53 inducible nuclear protein 1                                            | 94241              | 8q22         | YES                                     |
| 220623_s_at  | 0.598129995 | 7.12326061  | 1.15E-05 | 0.017906987 | TSGA10                 | testis specific, 10                                                                      | 80705              | 2q11.2       | YES                                     |
| 1561754_at   | 0.752863772 | 7.07149035  | 1.23E-05 | 0.018227574 | ---                    | ---                                                                                      | ---                | ---          | ---                                     |
| 209375_at    | 0.433008665 | 7.07085513  | 1.23E-05 | 0.018227574 | XPC                    | xeroderma pigmentosum, complementation group C                                           | 7508               | 3p25         | YES                                     |
| 217373_x_at  | 0.668641399 | 7.00726412  | 1.35E-05 | 0.01940828  | MDM2                   | Mdm2 p53 binding protein homolog (mouse)                                                 | 4193               | 12q14.3-q15  | ---                                     |
| 228176_at    | 0.63576854  | 6.89245445  | 1.59E-05 | 0.022253606 | S1PR3                  | sphingosine-1-phosphate receptor 3                                                       | 1903               | 9q22.1-q22.2 | YES                                     |
| 209693_at    | 0.841187944 | 6.82104892  | 1.76E-05 | 0.023282887 | ASTN2                  | astrotactin 2                                                                            | 23245              | 9q33.1       | ---                                     |
| 201392_s_at  | 0.513431286 | 6.82209671  | 1.76E-05 | 0.023282887 | IGF2R                  | insulin-like growth factor 2 receptor                                                    | 3482               | 6q26         | ---                                     |
| 237241_at    | 0.609194314 | 6.80738014  | 1.79E-05 | 0.023282887 | ECT2                   | Epithelial cell transforming sequence 2 oncogene                                         | 1894               | 3q26.1-q26.2 | ---                                     |
| 218192_at    | 0.404185932 | 6.79267799  | 1.83E-05 | 0.023282887 | IP6K2                  | inositol hexakisphosphate kinase 2                                                       | 51447              | 3p21.31      | ---                                     |
| 211767_at    | 0.492003221 | 6.72845486  | 2.01E-05 | 0.024962339 | GINS4                  | GINS complex subunit 4 (Slid5 homolog)                                                   | 84296              | 8p11.21      | ---                                     |
| 235102_x_at  | 0.463216647 | 6.71244826  | 2.06E-05 | 0.024979831 | ---                    | ---                                                                                      | ---                | ---          | ---                                     |
| 216252_x_at  | 0.551150618 | 6.65313722  | 2.24E-05 | 0.026635682 | FAS                    | Fas (TNF receptor superfamily, member 6)                                                 | 355                | 10q24.1      | YES                                     |
| 235681_at    | -0.70819464 | -6.53068985 | 2.68E-05 | 0.030442341 | ---                    | ---                                                                                      | ---                | ---          | ---                                     |
| 230090_at    | 0.495712416 | 6.52839339  | 2.69E-05 | 0.030442341 | LOC100287032           | similar to hCG2006445                                                                    | 100287032          | 5p13.2       | ---                                     |
| 219361_s_at  | 0.415127106 | 6.50880056  | 2.78E-05 | 0.030442341 | AEN                    | apoptosis enhancing nuclease                                                             | 64782              | 15q26.1      | ---                                     |
| 209709_s_at  | 0.366780512 | 6.49853714  | 2.81E-05 | 0.030442341 | HMMR                   | hyaluronan-mediated motility receptor (RHAMM)                                            | 3161               | 5q33.2-qter  | YES                                     |
| 226093_at    | 0.404489532 | 6.49178567  | 2.84E-05 | 0.030442341 | DCP1B                  | DCP1 decapping enzyme homolog B (S. cerevisiae)                                          | 196513             | 12p13.33     | YES                                     |
| 219928_s_at  | 0.596810459 | 6.46447512  | 2.96E-05 | 0.031088475 | CABRY                  | calcium binding tyrosine-[Y]-phosphorylation regulated                                   | 26256              | 18q11.2      | ---                                     |
| 229442_at    | 0.376682736 | 6.32579134  | 3.64E-05 | 0.037509865 | C18orf54               | chromosome 18 open reading frame 54                                                      | 162681             | 18q21.2      | ---                                     |
| 211163_s_at  | 0.796459467 | 6.26260955  | 4.00E-05 | 0.040487794 | TNFRSF10C              | or necrosis factor receptor superfamily, member 10c, decoy without an intracellular dorr | 8794               | 8p22-p21     | ---                                     |
| 240574_at    | -0.73005206 | -6.24891982 | 4.08E-05 | 0.040582074 | ---                    | ---                                                                                      | ---                | ---          | ---                                     |
| 241014_at    | 0.88013434  | 6.21756295  | 4.28E-05 | 0.041794375 | LOC339400              | hypothetical protein LOC339400                                                           | 339400             | 1q21.3       | ---                                     |
| 219655_at    | 0.585624754 | 6.17501992  | 4.57E-05 | 0.043801166 | C7orf10                | chromosome 7 open reading frame 10                                                       | 79783              | 7p14.1       | YES                                     |
| 235217_at    | -0.50448754 | -6.15228329 | 4.73E-05 | 0.044562587 | LOC100216546           | hypothetical LOC100216546                                                                | 100216546          | ---          | ---                                     |
| 217168_s_at  | -0.47557235 | -6.12601403 | 4.92E-05 | 0.04505211  | HERPUD1                | ocysteine-inducible, endoplasmic reticulum stress-inducible, ubiquitin-like domain memt  | 9709               | 16q12.2-q13  | ---                                     |
| 228620_at    | 0.600746772 | 6.1162946   | 4.99E-05 | 0.04505211  | ---                    | ---                                                                                      | ---                | ---          | ---                                     |
| 201061_s_at  | 0.408183651 | 6.11210921  | 5.03E-05 | 0.04505211  | STOM                   | stomatin                                                                                 | 2040               | 9q34.1       | YES                                     |
| 235534_at    | 0.519974802 | 6.10049006  | 5.12E-05 | 0.045120932 | ---                    | ---                                                                                      | ---                | ---          | ---                                     |
