# Supplementary material
Source: PubMed Central journal article supplement (PMC6522287)
Supplement: NIHMS1526390-supplement-4.pdf [file NIHMS1526390-supplement-4.pdf]

### Supplementary Table 3. Genome-wide expression analysis of sh-p105 cells treated with vehicle vs. sh-p105 cells treated with TMZ

| ID           | logFC     | t            | P.Value  | adj.P.Val | Gene Symbol            | Gene Title                                                                       | Entrez Gene ID     | Cytoband      | Overlapped in "sh-p105 vs. sh-p105 TMZ" |
|--------------|-----------|--------------|----------|-----------|------------------------|----------------------------------------------------------------------------------|--------------------|---------------|-----------------------------------------|
| 221577_x_at  | 1.620650  | 20.7548645   | 7.73E-11 | 0.0000042 | GDF15 /// LOC100292463 | growth differentiation factor 15 /// similar to growth differentiation factor 15 | 100292463 /// 9518 | 19p13.11      | YES                                     |
| 202284_s_at  | 0.922874  | 14.35487549  | 5.71E-09 | 0.0001362 | CDKN1A                 | cyclin-dependent kinase inhibitor 1A (p21, Cip1)                                 | 1026               | 6p21.2        | YES                                     |
| 207813_s_at  | 0.963293  | 14.02171158  | 7.47E-09 | 0.0001362 | FDXR                   | ferredoxin reductase                                                             | 2232               | 17q24-q25     | YES                                     |
| 237737_at    | 0.853938  | 12.71013739  | 2.29E-08 | 0.0003129 | LOC100289026           | similar to hCG1744891                                                            | 100289026          | ---           | YES                                     |
| 1559462_at   | 0.930399  | 12.22237523  | 3.56E-08 | 0.0003895 | ---                    | ---                                                                              | ---                | ---           | YES                                     |
| 236640_at    | -0.717386 | -10.22338716 | 2.59E-07 | 0.0021283 | LOC399959              | Hypothetical LOC399959                                                           | 399959             | 11q24.1       | YES                                     |
| 203409_at    | 0.650551  | 10.17721875  | 2.72E-07 | 0.0021283 | DDB2                   | damage-specific DNA binding protein 2, 48kDa                                     | 1643               | 11p12-p11     | YES                                     |
| 18346_s_at   | 0.671656  | 9.77278549   | 4.24E-07 | 0.0028963 | SESN1                  | sestrin 1                                                                        | 27244              | 6q21          | YES                                     |
| 1555786_s_at | 0.579254  | 9.49911721   | 5.76E-07 | 0.0029713 | C14orf34               | chromosome 14 open reading frame 34                                              | 645687             | 14q22.3       | ---                                     |
| 204780_s_at  | 0.617602  | 9.451057183  | 6.09E-07 | 0.0029713 | FAS                    | Fas (TNF receptor superfamily, member 6)                                         | 355                | 10q24.1       | YES                                     |
| 201236_s_at  | 0.826902  | 9.415419015  | 6.34E-07 | 0.0029713 | BTG2                   | BTG family, member 2                                                             | 7832               | 1q32          | YES                                     |
| 238733_at    | 0.884952  | 9.390489092  | 6.52E-07 | 0.0029713 | ---                    | ---                                                                              | ---                | ---           | YES                                     |
| 229868_s_at  | 1.311703  | 9.286411985  | 7.35E-07 | 0.0030915 | LOC100287132           | hypothetical protein LOC100287132                                                | 100287132          | 19p13.11      | YES                                     |
| 239814_at    | 0.631694  | 9.122543569  | 8.89E-07 | 0.0034734 | ---                    | ---                                                                              | ---                | ---           | ---                                     |
| 201061_s_at  | 0.596538  | 8.932516235  | 1.11E-06 | 0.0040572 | STOM                   | stomatol                                                                         | 2040               | 9q34.1        | YES                                     |
| 205543_at    | 0.571807  | 8.855661359  | 1.22E-06 | 0.0041691 | HSPA4L                 | heat shock 70kDa protein 4-like                                                  | 22824              | 4q28          | YES                                     |
| 204781_s_at  | 0.495217  | 8.135050207  | 2.97E-06 | 0.0084026 | FAS                    | Fas (TNF receptor superfamily, member 6)                                         | 355                | 10q24.1       | YES                                     |
| 238364_x_at  | 0.565576  | 8.13055041   | 2.99E-06 | 0.0084026 | GLI4                   | GLI family zinc finger 4                                                         | 2738               | 8q24.3        | ---                                     |
| 225842_at    | -0.500197 | -8.117276308 | 3.04E-06 | 0.0084026 | PHLDA1                 | pleckstrin homology-like domain, family A, member 1                              | 22822              | 12q15         | ---                                     |
| 1558846_at   | 0.498705  | 8.09920986   | 3.11E-06 | 0.0084026 | PNLIPRP3               | pancreatic lipase-related protein 3                                              | 119548             | 10q25.3       | ---                                     |
| 1566147_a_at | 0.732125  | 8.070685087  | 3.23E-06 | 0.0084026 | LOC375010              | ankyrin repeat domain 20 family, member A pseudogene                             | 375010             | 10q1.1        | YES                                     |
| 227863_at    | -0.562050 | -7.960279441 | 3.72E-06 | 0.0087544 | LOC402778              | CD225 family protein FLJ76511                                                    | 402778             | 11p15.1       | ---                                     |
| 238232_at    | 0.943308  | 7.877297547  | 4.14E-06 | 0.0087544 | ---                    | ---                                                                              | ---                | ---           | ---                                     |
| 1554015_a_at | 0.490561  | 7.876145475  | 4.15E-06 | 0.0087544 | CHD2                   | chromodomain helicase DNA binding protein 2                                      | 1106               | 15q26         | ---                                     |
| 226093_at    | 0.490768  | 7.876501384  | 4.15E-06 | 0.0087544 | DCP1B                  | DCP1 decapping enzyme homolog B (S. cerevisiae)                                  | 196513             | 12p13.33      | YES                                     |
| 209773_s_at  | 0.423316  | 7.817146237  | 4.48E-06 | 0.0087544 | RRM2                   | ribonucleotide reductase M2                                                      | 6241               | 2p25-p24      | ---                                     |
| 200974_at    | 0.523183  | 7.81366175   | 4.50E-06 | 0.0087544 | ACTA2                  | actin, alpha 2, smooth muscle, aorta                                             | 59                 | 10q23.3       | YES                                     |
| 209806_at    | -0.491508 | -7.769821294 | 4.77E-06 | 0.0087544 | HIST1H2BK              | histone cluster 1, H2bk                                                          | 85236              | 6p21.33       | YES                                     |
| 239870_at    | 0.863530  | 7.766091457  | 4.79E-06 | 0.0087544 | SPATS1                 | spermatogenesis associated, serine-rich 1                                        | 221409             | 6p21.1        | ---                                     |
| 208890_s_at  | 0.608812  | 7.74681082   | 4.80E-06 | 0.0087544 | PLXNB2                 | plexin B2                                                                        | 23654              | 22q13.33      | YES                                     |
| 220818_s_at  | 0.558542  | 7.71283934   | 5.08E-06 | 0.0089649 | TRPC4                  | transient receptor potential cation channel, subfamily C, member 4               | 7223               | 13q13.1-q13.2 | ---                                     |
| 215407_s_at  | 0.730492  | 7.658344364  | 5.53E-06 | 0.0094477 | ASTN2                  | astrotactin 2                                                                    | 23245              | 9q33.1        | ---                                     |
| 218634_at    | 0.482353  | 7.420390607  | 7.62E-06 | 0.0126208 | PHLDA3                 | pleckstrin homology-like domain, family A, member 3                              | 23612              | 1q31          | ---                                     |
| 209375_at    | 0.451249  | 7.368716001  | 8.17E-06 | 0.0127813 | XPC                    | xeroderma pigmentosum, complementation group C                                   | 7508               | 3p25          | YES                                     |
| 201060_x_at  | 0.485216  | 7.367557063  | 8.18E-06 | 0.0127813 | STOM                   | stomatol                                                                         | 2040               | 9q34.1        | YES                                     |
| 228176_at    | 0.672300  | 7.288493061  | 9.12E-06 | 0.0138478 | S1PR3                  | sphingosine-1-phosphate receptor 3                                               | 1903               | 9q22.1-q22.2  | YES                                     |
| 219508_at    | 0.456304  | 7.262071985  | 9.46E-06 | 0.0139726 | GCNT3                  | glucosaminyl (N-acetyl) transferase 3, mucin type                                | 9245               | 15q21.3       | ---                                     |
| 218248_at    | 0.424573  | 7.220481838  | 1.00E-05 | 0.0144091 | FAM111A                | family with sequence similarity 111, member A                                    | 63901              | 11q12.1       | ---                                     |
| 235063_at    | 0.393013  | 7.157559193  | 1.09E-05 | 0.0151761 | C20orf196              | chromosome 20 open reading frame 196                                             | 149840             | 20p12.3       | ---                                     |
| 215199_x_at  | 0.592430  | 7.146167394  | 1.11E-05 | 0.0151761 | FAS                    | Fas (TNF receptor superfamily, member 6)                                         | 355                | 10q24.1       | YES                                     |
| 240228_at    | 0.687953  | 7.126187537  | 1.14E-05 | 0.0152241 | CSMD3                  | CUB and Sushi multiple domains 3                                                 | 114788             | 8q23.3        | ---                                     |
| 220623_s_at  | 0.586785  | 6.98815598   | 1.39E-05 | 0.0180400 | TSGA10                 | testis specific, 10                                                              | 80705              | 2q11.2        | YES                                     |
| 222879_s_at  | 0.523327  | 6.874603097  | 1.63E-05 | 0.0204055 | POLH                   | polymerase (DNA directed), eta                                                   | 5429               | 6p21.1        | ---                                     |
| 215977_x_at  | 0.394300  | 6.868676324  | 1.64E-05 | 0.0204055 | GK                     | glycerol kinase                                                                  | 2710               | Xp12.3        | ---                                     |
| 214696_at    | -0.381561 | -6.752585813 | 1.94E-05 | 0.0234991 | C17orf91               | chromosome 17 open reading frame 91                                              | 84981              | 17p13.3       | ---                                     |
| 225381_at    | -0.443490 | -6.726633602 | 2.01E-05 | 0.0234991 | LOC399959              | hypothetical LOC399959                                                           | 399959             | 11q24.1       | ---                                     |
| 215364_s_at  | 0.449246  | 6.724618572  | 2.02E-05 | 0.0234991 | KIAA0467               | KIAA0467                                                                         | 23334              | 1p34.2        | ---                                     |
| 209301_at    | 0.563566  | 6.676877558  | 2.16E-05 | 0.0240133 | CA2                    | carbonic anhydrase II                                                            | 760                | 8q22          | ---                                     |
| 236105_at    | 0.628684  | 6.649402409  | 2.25E-05 | 0.0240133 | ZBTB10                 | zinc finger and BTB domain containing 10                                         | 65986              | 8q13-q21.1    | ---                                     |
| 235251_at    | -0.468699 | -6.647428348 | 2.26E-05 | 0.0240133 | ---                    | ---                                                                              | ---                | ---           | ---                                     |
| 60084_at     | -0.477132 | -6.64136502  | 2.28E-05 | 0.0240133 | CYLD                   | cyldromatosis (turban tumor syndrome)                                            | 1540               | 16q12.1       | ---                                     |
| 208257_x_at  | 0.453865  | 6.627386471  | 2.33E-05 | 0.0240133 | PSG1                   | pregnancy specific beta-1-glycoprotein 1                                         | 5669               | 19q13.2       | ---                                     |
| 240259_at    | 0.679901  | 6.627075001  | 2.33E-05 | 0.0240133 | FLRT2                  | Fibronectin leucine rich transmembrane protein 2                                 | 23768              | 14q24-q32     | ---                                     |
| 210046_s_at  | 0.403229  | 6.530480613  | 2.68E-05 | 0.0271554 | IDH2                   | isocitrate dehydrogenase 2 (NADP+), mitochondrial                                | 3418               | 15q26.1       | ---                                     |
| 204566_at    | 0.561175  | 6.511788646  | 2.76E-05 | 0.0274066 | PPM1D                  | protein phosphatase, Mg2+/Mn2+ dependent, 1D                                     | 8493               | 17q23.2       | ---                                     |
| 200798_x_at  | -0.502992 | -6.492073004 | 2.84E-05 | 0.0277125 | MCL1                   | myeloid cell leukemia sequence 1 (BCL2-related)                                  | 4170               | 1q21          | ---                                     |
| 204803_s_at  | 0.518074  | 6.42354654   | 3.14E-05 | 0.0301382 | RRAD                   | Ras-related associated with diabetes                                             | 6236               | 16q22         | ---                                     |
| 1555623_at   | -0.866557 | -6.410693768 | 3.20E-05 | 0.0301906 | ---                    | ---                                                                              | ---                | ---           | ---                                     |
| 206039_at    | 0.422015  | 6.395719458  | 3.27E-05 | 0.0303486 | RAB33A                 | RAB33A, member RAS oncogene family                                               | 9363               | Xq26.1        | ---                                     |
| 225803_at    | 0.433874  | 6.365370539  | 3.43E-05 | 0.0309646 | FBXO32                 | F-box protein 32                                                                 | 114907             | 8q24.13       | ---                                     |
| 225912_at    | 0.625730  | 6.359946737  | 3.45E-05 | 0.0309646 | TP53INP1               | tumor protein p53 inducible nuclear protein 1                                    | 94241              | 8q22          | YES                                     |
| 131293_s_at  | 0.426763  | 6.320348547  | 3.67E-05 | 0.0319229 | TRIM22                 | tripartite motif-containing 22                                                   | 10346              | 11p15         | ---                                     |
| 209709_s_at  | 0.356596  | 6.318098769  | 3.68E-05 | 0.0319229 | HMMR                   | hyaluronan-mediated motility receptor (RHAMM)                                    | 3161               | 5q33.2-qter   | YES                                     |
| 226552_at    | -0.377600 | -6.291841559 | 3.83E-05 | 0.0326868 | IERSL                  | immediate early response 5-like                                                  | 389792             | 9q34.11       | ---                                     |
| 216252_x_at  | 0.520116  | 6.278501574  | 3.90E-05 | 0.0326868 | FAS                    | Fas (TNF receptor superfamily, member 6)                                         | 355                | 10q24.1       | YES                                     |
| 204774_at    | 0.425515  | 6.271463065  | 3.95E-05 | 0.0326868 | EV12A                  | ectropic viral integration site 2A                                               | 2123               | 17q11.2       | ---                                     |
| 1556496_a_at | -0.526914 | -6.258008214 | 4.03E-05 | 0.0328594 | ---                    | ---                                                                              | ---                | ---           | ---                                     |
| 217920_at    | 0.424788  | 6.24092634   | 4.13E-05 | 0.0332228 | MAN1A2                 | mannosidase, alpha, class 1A, member 2                                           | 10905              | 1p13          | ---                                     |
| 205733_at    | 0.365998  | 6.202096908  | 4.38E-05 | 0.0343442 | BLM                    | Bloom syndrome, RecQ helicase-like                                               | 641                | 15q26.1       | ---                                     |
| 206239_s_at  | 0.519974  | 6.199882879  | 4.40E-05 | 0.0343442 | SPINK1                 | serine peptidase inhibitor, Kazal type 1                                         | 6690               | 5q32          | ---                                     |
| 210559_s_at  | 0.380993  | 6.188007239  | 4.48E-05 | 0.0344768 | CDK1                   | cyclin-dependent kinase 1                                                        | 983                | 10q21.1       | ---                                     |
| 212298_at    | -0.402586 | -6.169143862 | 4.61E-05 | 0.0349874 | NRP1                   | neuropilin 1                                                                     | 8829               | 10p12         | ---                                     |
| 209648_x_at  | -0.458447 | -6.158004798 | 4.69E-05 | 0.0350985 | SOC5                   | suppressor of cytokine signaling 5                                               | 9655               | 2p21          | ---                                     |
| 221611_s_at  | 0.481379  | 6.143388324  | 4.79E-05 | 0.0352140 | PHF7                   | PHD finger protein 7                                                             | 51533              | 3p21.1        | ---                                     |
| 204969_at    | 0.493112  | 6.13812732   | 4.83E-05 | 0.0352140 | ---                    | ---                                                                              | ---                | ---           | ---                                     |
| 1553348_a_at | 0.440738  | 6.124779213  | 4.93E-05 | 0.0353159 | NFX1                   | nuclear transcription factor, X-box binding 1                                    | 4799               | 9p13.3        | ---                                     |
| 204011_at    | -0.367115 | -6.119009721 | 4.97E-05 | 0.0353159 | SPRY2                  | sprouty homolog 2 (Drosophila)                                                   | 10253              | 13q31.1       | ---                                     |
| 231180_at    | 0.512656  | 6.093443495  | 5.17E-05 | 0.0362547 | ---                    | ---                                                                              | ---                | ---           | ---                                     |
| 213139_at    | -0.385191 | -6.066395054 | 5.39E-05 | 0.0364912 | SNAI2                  | snail homolog 2 (Drosophila)                                                     | 6591               | 8q11          | ---                                     |
| 1554783_s_at | 0.728941  | 6.061593632  | 5.43E-05 | 0.0364912 | ARHGEF2                | Rho/Rac guanine nucleotide exchange factor (GEF) 2                               | 9181               | 1q21-q22      | ---                                     |
| 219655_at    | 0.574472  | 6.057416788  | 5.47E-05 | 0.0364912 | C7orf10                | chromosome 7 open reading frame 10                                               | 79783              | 7p14.1        | YES                                     |
| 237352_at    | -0.447874 | -6.05663111  | 5.47E-05 | 0.0364912 | ---                    | ---                                                                              | ---                | ---           | ---                                     |
| 229711_s_at  | 0.472421  | 6.019758455  | 5.79E-05 | 0.0379516 | MDM2                   | Mdm2 p53 binding protein homolog (mouse)                                         | 4193               | 12q14.3-q15   | YES                                     |
| 215785_s_at  | 0.402287  | 6.015517713  | 5.83E-05 | 0.0379516 | CYFIP2                 | cytoplasmic FMR1 interacting protein 2                                           | 26999              | 5q33.3        | ---                                     |
| 226800_at    | 0.527267  | 5.971554837  | 6.24E-05 | 0.0397661 | EFCAB7                 | EF-hand calcium binding domain 7                                                 | 84455              | 1p31.3        | ---                                     |
| 209230_s_at  | 0.482496  | 5.970104834  | 6.25E-05 | 0.0397661 | NUPR1                  | nuclear protein, transcriptional regulator, 1                                    | 26471              | 16p11.2       | ---                                     |
| 210416_s_at  | 0.356868  | 5.961032015  | 6.34E-05 | 0.0398658 | CHEK2                  | CHEK2 checkpoint homolog (S. pombe)                                              | 11200              | 22q11.22q12.1 | ---                                     |
| 222162_s_at  | -0.376227 | -5.941223246 | 6.54E-05 | 0.0406436 | ADAMTS1                | ADAM metalloproteinase with thrombospondin type 1 motif, 1                       | 9510               | 21q21.2       | ---                                     |
| 223196_s_at  | 0.379700  | 5.921114661  | 6.75E-05 | 0.0414635 | SESN2                  | sestrin 2                                                                        | 83667              | 1p35.3        | ---                                     |
| 208107_s_at  | 0.386089  | 5.90475031   | 6.92E-05 | 0.0418264 | LOC81691               | exonuclease NEF-sp                                                               | 81691              | 16p12.3       | ---                                     |
| 206157_at    | -0.495451 | -5.898246042 | 6.99E-05 | 0.0418264 | PTX3                   | pentraxin 3, long                                                                | 5806               | 3q25          | ---                                     |
| 215205_x_at  | 0.394994  | 5.894250438  | 7.04E-05 | 0.0418264 |                        |                                                                                  |                    |               |                                         |
