# Supplementary material
Source: PubMed Central journal article supplement (PMC6522287)
Supplement: NIHMS1526390-supplement-5.pdf [file NIHMS1526390-supplement-5.pdf]

**Supplementary Table 4.** Significantly modified genes. List of the most significantly altered genes (FDR < 0.01) from the 32 transcripts unique to sh-control expressing cells. These genes were not altered in cells expressing sh-p50/p105.

| <b>ID</b>   | <b>logFC</b> | <b>FoldC</b> | <b>adj p value</b> | <b>Gene Symbol</b> | <b>Cytoband</b> |
|-------------|--------------|--------------|--------------------|--------------------|-----------------|
| 201939_at   | 0.5426       | 1.4566       | 0.0023             | PLK2               | 5q12.1-q13.2    |
| 208490_x_at | -0.6682      | 0.6293       | 0.0039             | HIST1H2BF          | 6p21.3          |
| 244117_at   | 0.9407       | 1.9195       | 0.0052             | ---                | ---             |
| 242134_at   | 0.6184       | 1.5351       | 0.0071             | ---                | ---             |
| 208579_x_at | -0.6263      | 0.6478       | 0.0093             | H2BFS              | 21q22.3         |
| 228582_x_at | 0.7875       | 1.7260       | 0.0094             | MALAT1             | 11q13.1         |
| 210609_s_at | 0.5861       | 1.5011       | 0.0094             | TP53I3             | 2p23.3          |
| 235456_at   | -1.1065      | 0.4644       | 0.0094             | ---                | ---             |
